# Supplementary material for: Multi-walled carbon nanotube-based carbon/carbon composites with three-dimensional network structures
Source: Royal Society of Chemistry journal article supplement (doi:10.1039/c3nr01069d), 2013-01-01
Supplement: c3nr01069d.pdf [file c3nr01069d.pdf]

## Multiwall carbon nanotube-based carbon/carbon composites with three-dimensional network structures

Yuguang Jin<sup>a</sup>, Yingying Zhang<sup>\*b</sup>, Qiang Zhang<sup>a</sup>, Rufan Zhang<sup>a</sup>, Peng Li<sup>a</sup>, Weizhong Qian<sup>a</sup>, and Fei Wei<sup>\*a,b</sup>

<sup>a</sup>Beijing Key Laboratory of Green Chemical Reaction Engineering and Technology, Tsinghua University, Beijing, China 100084

Fax: +86-10-6277-2051; Tel: +86-10-6278-5464; E-mail: wf-dce@tsinghua.edu.cn

<sup>b</sup>Center for Nano and Micro Mechanics, Tsinghua University, Beijing, China 100084  
Fax: +86-10-6279-8028; Tel: +86-10-6279-8503; Email: yingingzhang@tsinghua.edu.cn

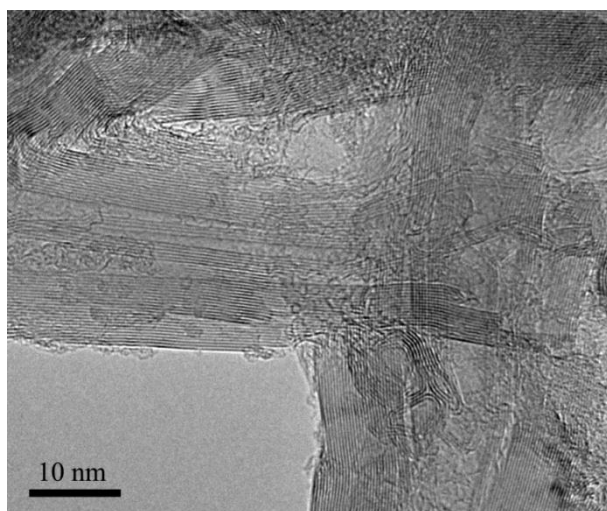

**Fig. S1** TEM image of connected joint of two CNTs in A-P-MWCNT composites.

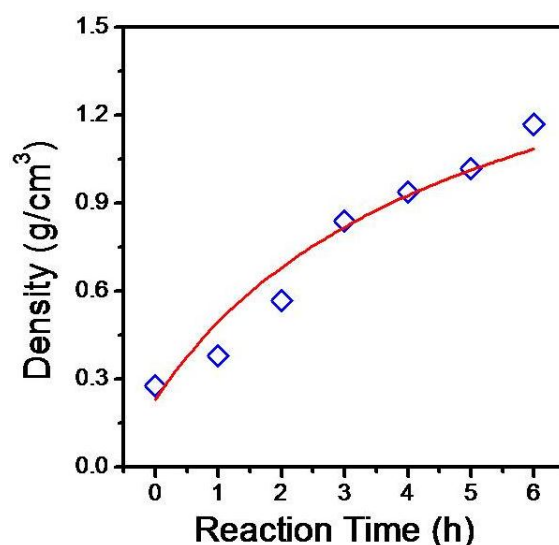

**Fig. S2** Deposition curve (density vs. time) of P-MWCNT/C composite.

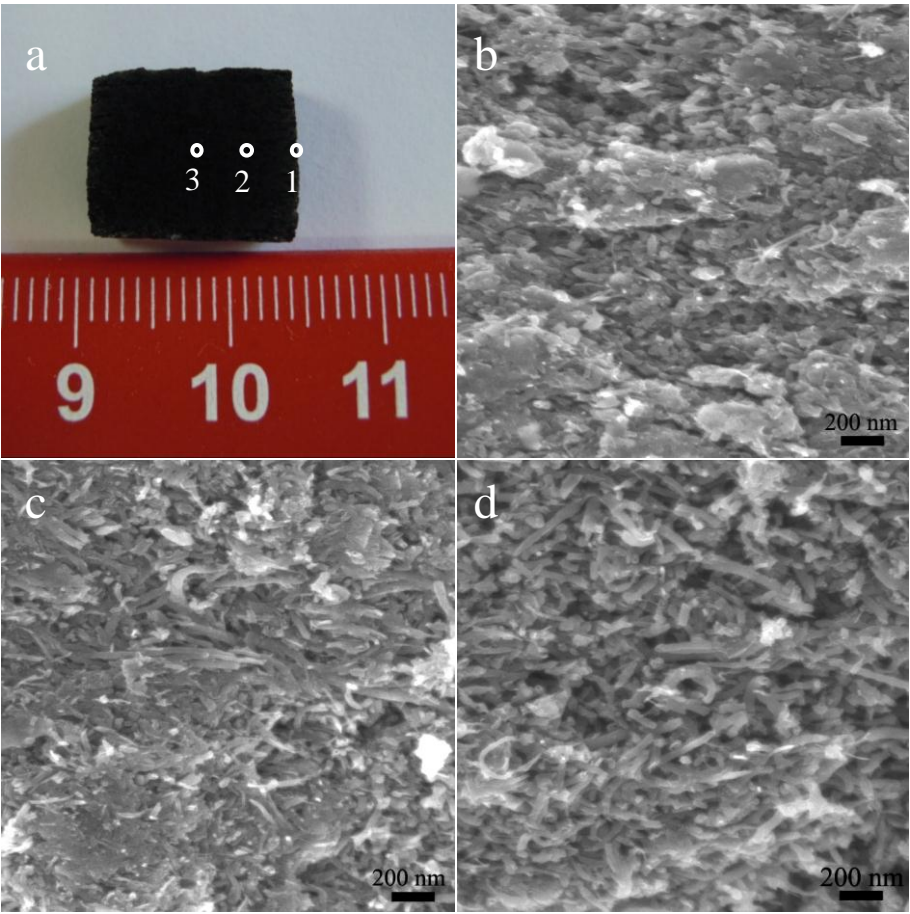

**Fig. S3** (a) Optical image of P-MWCNT/C after 5 h deposition, and their SEM morphology of outside into the interior (b-1; c-2; d-3).
